# Supplementary material
Source: PubMed Central journal article supplement (PMC4933781)
Supplement: CVI.00248-16_zcd999095374so1.pdf [file CVI.00248-16_zcd999095374so1.pdf]

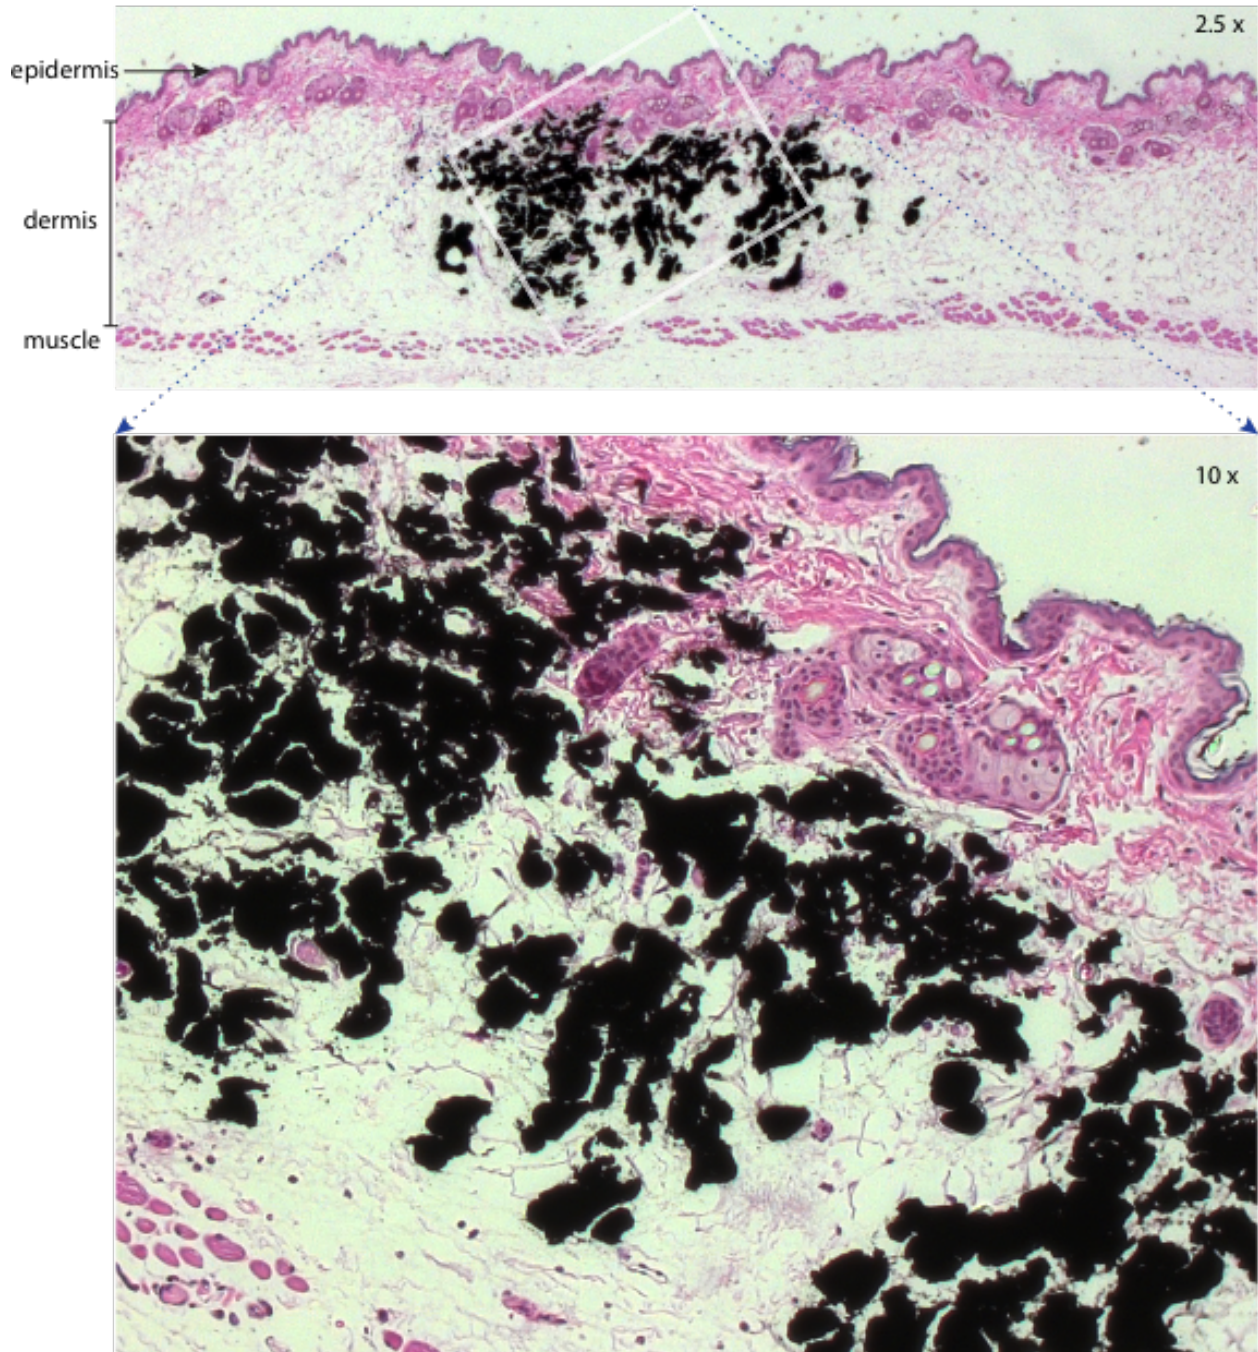

**supplemental figure 1**

**FIG s1.** Confirmation of intradermal injection technique. Following injection with black tattoo ink skin biopsies were obtained for H&E staining. Microscopic images (2.5x top), and (10x) magnification of the indicated area (bottom).
